# Supplementary material for: Exploring the feasibility of solar mini-grids for island communities in Uganda
Source: Research Square preprint supplement (doi:10.21203/rs.3.rs-6354709/v1), 2025-05-05
Supplement: Supplementary file 1 [file 3f1420a4c0db6991ce0d97a6.pdf]

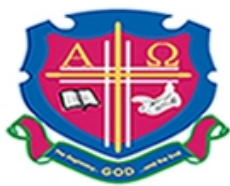

# UGANDA CHRISTIAN UNIVERSITY

A Centre of Excellence in the Heart of Africa

04/08/2022

To: Elizabeth Kizito

Uganda Christian University  
+256752141377

**Type:** Initial Review

**Re: UCUREC-2022-290: Application of Off-Grid Solar Systems for Education and Training on an island in Lake Victoria in Uganda , ,**

I am pleased to inform you that the Uganda Christian University REC, through expedited review held on **04/08/2022** approved the above referenced study.

Approval of the research is for the period of **04/08/2022** to **04/08/2023**.

As Principal Investigator of the research, you are responsible for fulfilling the following requirements of approval:

1. All co-investigators must be kept informed of the status of the research.
2. Changes, amendments, and addenda to the protocol or the consent form must be submitted to the REC for re-review and approval **prior** to the activation of the changes.
3. Reports of unanticipated problems involving risks to participants or any new information which could change the risk benefit: ratio must be submitted to the REC.
4. Only approved consent forms are to be used in the enrollment of participants. All consent forms signed by participants and/or witnesses should be retained on file. The REC may conduct audits of all study records, and consent documentation may be part of such audits.
5. Continuing review application must be submitted to the REC **eight weeks** prior to the expiration date of **04/08/2023** in order to continue the study beyond the approved period. Failure to submit a continuing review application in a timely fashion may result in suspension or termination of the study.
6. The REC application number assigned to the research should be cited in any correspondence with the REC of record.
7. You are required to register the research protocol with the Uganda National Council for Science and Technology (UNCST) for final clearance to undertake the study in Uganda.

The following is the list of all documents approved in this application by Uganda Christian University REC:

| No. | Document Title         | Language | Version Number | Version Date |
|-----|------------------------|----------|----------------|--------------|
| 1   | Informed Consent forms | Luganda  | PDF            | 2022-08-23   |
| 2   | Informed Consent forms | English  | PDF            | 2022-08-23   |
| 3   | Proposal               | English  | PDF            | 2022-06-23   |
| 4   | District clearance     | English  | PDF            | 2022-06-10   |

Yours Sincerely



Peter Waiswa

For: Uganda Christian University REC
